# Supplementary material
Source: PubMed Central journal article supplement (PMC8159895)

**Supplementary Table 1. DNA sequences of expression constructs and CRISPR guides**

| DNA Name                   | DNA Sequence                                                                                                                                                                                                                                                                                                                                                                                                                                                                                                                                                                                                                                                                                                                                                                                                                                                                                                                                                                                                                                                                                                                                                                                                                                                                                                                                                                                                                                                                                                                                                                                                                                                                                                                                                                                                                                                                                                                                                                                                                                                                                                                                                                                                                                                                |
|----------------------------|-----------------------------------------------------------------------------------------------------------------------------------------------------------------------------------------------------------------------------------------------------------------------------------------------------------------------------------------------------------------------------------------------------------------------------------------------------------------------------------------------------------------------------------------------------------------------------------------------------------------------------------------------------------------------------------------------------------------------------------------------------------------------------------------------------------------------------------------------------------------------------------------------------------------------------------------------------------------------------------------------------------------------------------------------------------------------------------------------------------------------------------------------------------------------------------------------------------------------------------------------------------------------------------------------------------------------------------------------------------------------------------------------------------------------------------------------------------------------------------------------------------------------------------------------------------------------------------------------------------------------------------------------------------------------------------------------------------------------------------------------------------------------------------------------------------------------------------------------------------------------------------------------------------------------------------------------------------------------------------------------------------------------------------------------------------------------------------------------------------------------------------------------------------------------------------------------------------------------------------------------------------------------------|
| <b>Reporter constructs</b> |                                                                                                                                                                                                                                                                                                                                                                                                                                                                                                                                                                                                                                                                                                                                                                                                                                                                                                                                                                                                                                                                                                                                                                                                                                                                                                                                                                                                                                                                                                                                                                                                                                                                                                                                                                                                                                                                                                                                                                                                                                                                                                                                                                                                                                                                             |
| <i>IDH2-C-VN210</i>        | <p>ATGGCCGGCTACCTGCGGGTCTGTCGCTCGCTCTGCAGAGCCTCAGGCTCGCGGCCGGCCTGGG<br/> CGCCGGCGGCCCTGACAGCCCCACCTCGCAAGAGCAGCCGCGGCCACTATGCCGACAAAAG<br/> GATCAAGGTGGCGAAGCCCGTGGTGGAGATGGATGGTATGAGATGACCCGTATTATCTGGCAGTT<br/> CATCAAGGAGAAGCTCATCCTGCCCCACGTGGACATCCAGCTAAAGTATTTTGACCTCGGGCTCCC<br/> AAACCGTGACCAGACTGATGACCAGGTACCATTGACTCTGCACTGGCCACCCAGAAGTACAGTGT<br/> GGCTGTCAAGTGTGCCACCATACCCCTGATGAGGCCCGTGTGGAAGAGTTCAAGCTGAAGAAGAT<br/> GTGGAAAAGTCCCAATGGAACATCCGGAACATCCTGGGGGGGACTGTCTTCCGGGAGCCCATCAT<br/> CTGCAAAAACATCCCACGCCCTAGTCCCTGGCTGGACCAAGCCCATCACCATTGGCAGGCACGCCA<br/> TGGCGACCAGTACAAGGCCACAGACTTTGTGGCAGACCCGGCCGGCATTTCAAAATGGTCTTCAC<br/> CCCAAAAGATGGCAGTGGTGTCAAGGAGTGGGAAGTGTACAACCTCCCCGAGGCCGGCGTGGGCA<br/> TGGGCATGTACAACACCGACGAGTCCATCTCAGGTTTTGCGCACAGCTGCTTCCAGTATGCCATCC<br/> AGAAGAAATGGCCGCTGTACATGAGCACCAAGAACCATACTGAAAGCCTACGATGGGCGTTTTCA<br/> AGGACATCTTCCAGGAGATCTTTGACAAGCACTATAAGACCGACTTCGACAAGAATAAGATCTGGTA<br/> TGAGCACCGGCTCATTGATGACATGGTGGCTCAGGTCCTCAAGTCTTCCGGGTGGCTTTGTGTGGGC<br/> CTGCAAGAACTATGACGGAGATGTGCAGTCAGACATCCTGGCCCAGGGCTTTGGCTCCCTTGGCCT<br/> GATGACGTCCTGCTGGTCTGCCCTGATGGGAAGACGATTGAGGCTGAGGCCGCTCATGGGACCCG<br/> TCACCCGCCACTATCGGGAGCACCAGAAGGGCCGGCCACCAGCACCAACCCCATCGCCAGCATC<br/> TTTGCCTGGACACGTGGCCTGGAGCACCGGGGGAAGCTGGATGGGAACCAAGACCTCATCAGGTT<br/> TGCCCAGATGCTGGAGAAGGTGTGCGTGGAGACGGTGGAGAGTGGAGCCATGACCAAGGACCTG<br/> GCGGGCTGCATTACGGCCTCAGCAATGTGAAGCTGAACGAGCACTTCTGAACACCACGGACTTC<br/> CTCGACACCATCAAGAGCAACCTGGACAGACCCTGGGCAGGCAGGGCGGAGGTGGGAGCGGTG<br/> GAGGGGGAAGTGTGAGCAAGGGCGAGGAGCTGTTACCGGGGTGGTGGCCATCCTGGTTCGAGCT<br/> GGACGGCGACGTAACGGCCACAAGTTGAGCGTGTCCGGCGAGGGCGAGGGCGATGCCACCTAC<br/> GGCAAGCTGACCCTGAAGCTGATCTGCACCACCGGCAAGCTGCCCGTGCCTTGGCCACCCTCGT<br/> GACCACCCTGGGCTACGGCCTGCAGTCTTCCCGCTACCCCGACACATGAAGCAGCACGACT<br/> TCTTCAAGTCCGCCATGCCCGAAGGCTACGTCCAGGAGCGCACCATCTTCTTCAAGGACACGGCA<br/> ACTACAAGACCCGCGCGGAGGTGAAGTTCGAGGGCGACACCCTGGTGAACCGCATCGAGCTGAAG<br/> GGCATCGACTTCAAGGAGGACGGCAACATCCTGGGGCACAAGCTGGAGTACAACATAACAGCCA<br/> CAACGTCTATATCACCGCCGACAAGCAGAAGAACGGCATCAAGGCCAACTTCAAGATCCGCCACAA<br/> CATCGAGGACGGCGGCGTGCAGCTCGCCGACCCTACCCAGCAGAACAACCCCATCGGCAGCGCC<br/> CCCGTGTCTGCTGCCCGACAACCACTACCTGAGCTACCAGTCCAAGCTGAGCAAAGACTAG</p> |
| <i>IDH2-C-VC210</i>        | <p>ATGGCCGGCTACCTGCGGGTCTGTCGCTCGCTCTGCAGAGCCTCAGGCTCGCGGCCGGCCTGGG<br/> CGCCGGCGGCCCTGACAGCCCCACCTCGCAAGAGCAGCCGCGGCCACTATGCCGACAAAAG<br/> GATCAAGGTGGCGAAGCCCGTGGTGGAGATGGATGGTATGAGATGACCCGTATTATCTGGCAGTT<br/> CATCAAGGAGAAGCTCATCCTGCCCCACGTGGACATCCAGCTAAAGTATTTTGACCTCGGGCTCCC<br/> AAACCGTGACCAGACTGATGACCAGGTACCATTGACTCTGCACTGGCCACCCAGAAGTACAGTGT<br/> GGCTGTCAAGTGTGCCACCATACCCCTGATGAGGCCCGTGTGGAAGAGTTCAAGCTGAAGAAGAT<br/> GTGGAAAAGTCCCAATGGAACATCCGGAACATCCTGGGGGGGACTGTCTTCCGGGAGCCCATCAT<br/> CTGCAAAAACATCCCACGCCCTAGTCCCTGGCTGGACCAAGCCCATCACCATTGGCAGGCACGCCA<br/> TGGCGACCAGTACAAGGCCACAGACTTTGTGGCAGACCCGGCCGGCATTTCAAAATGGTCTTCAC<br/> CCCAAAAGATGGCAGTGGTGTCAAGGAGTGGGAAGTGTACAACCTCCCCGAGGCCGGCGTGGGCA<br/> TGGGCATGTACAACACCGACGAGTCCATCTCAGGTTTTGCGCACAGCTGCTTCCAGTATGCCATCC<br/> AGAAGAAATGGCCGCTGTACATGAGCACCAAGAACCATACTGAAAGCCTACGATGGGCGTTTTCA<br/> AGGACATCTTCCAGGAGATCTTTGACAAGCACTATAAGACCGACTTCGACAAGAATAAGATCTGGTA<br/> TGAGCACCGGCTCATTGATGACATGGTGGCTCAGGTCCTCAAGTCTTCCGGGTGGCTTTGTGTGGGC<br/> CTGCAAGAACTATGACGGAGATGTGCAGTCAGACATCCTGGCCCAGGGCTTTGGCTCCCTTGGCCT<br/> GATGACGTCCTGCTGGTCTGCCCTGATGGGAAGACGATTGAGGCTGAGGCCGCTCATGGGACCCG<br/> TCACCCGCCACTATCGGGAGCACCAGAAGGGCCGGCCACCAGCACCAACCCCATCGCCAGCATC<br/> TTTGCCTGGACACGTGGCCTGGAGCACCGGGGGAAGCTGGATGGGAACCAAGACCTCATCAGGTT<br/> TGCCCAGATGCTGGAGAAGGTGTGCGTGGAGACGGTGGAGAGTGGAGCCATGACCAAGGACCTG<br/> GCGGGCTGCATTACGGCCTCAGCAATGTGAAGCTGAACGAGCACTTCTGAACACCACGGACTTC<br/> CTCGACACCATCAAGAGCAACCTGGACAGACCCTGGGCAGGCAGGGCGGAGGTGGGAGCGGTG<br/> GAGGGGGAAGTGAACCAACGAGAAGCGGATCACATGGTCTGCTGGAGTTCGTGACCGCCGCC<br/> GGGATCACTCTCGGCATGGACGAGCTGTACAAGTAG</p>                                                                                                                                                                                                                                                                                                                                                                                                                                                                                                                                                                                                            |

|                               |                                                                                                                                                                                                                                                                                                                                                                                                                                                                                                                                                                                                                                                                                                                                                                                                                                                                                                                                                                                                                                                                                                                                                                                                                                                                                                                                                                                                                                                                                                                                                                                                                                                                                                                                                                                                                                                                                                                                                                                                                                                                                                                                                                                                                                                                                                                                    |
|-------------------------------|------------------------------------------------------------------------------------------------------------------------------------------------------------------------------------------------------------------------------------------------------------------------------------------------------------------------------------------------------------------------------------------------------------------------------------------------------------------------------------------------------------------------------------------------------------------------------------------------------------------------------------------------------------------------------------------------------------------------------------------------------------------------------------------------------------------------------------------------------------------------------------------------------------------------------------------------------------------------------------------------------------------------------------------------------------------------------------------------------------------------------------------------------------------------------------------------------------------------------------------------------------------------------------------------------------------------------------------------------------------------------------------------------------------------------------------------------------------------------------------------------------------------------------------------------------------------------------------------------------------------------------------------------------------------------------------------------------------------------------------------------------------------------------------------------------------------------------------------------------------------------------------------------------------------------------------------------------------------------------------------------------------------------------------------------------------------------------------------------------------------------------------------------------------------------------------------------------------------------------------------------------------------------------------------------------------------------------|
| <p><i>UQCRB-C-VN210</i></p>   | <p>ATGGCTGGTAAGCAGGCCGTTTCAGCATCAGGCAAGTGGCTGGATGGTATTTCGAAAAATGGTATTAC<br/>AATGCTGCAGATTCAATAAACTGGGGTTAATGCGAGATGATACAATATACGAGGATGAAGATGTAA<br/>AAGAAGCCATAAGAAGACTTCTGAGAACCCTTATAATGACAGGATGTTTTCGCATTAAGAGGGCCT<br/>GGACCTGAACTTGAAGCATCAGATCTTGCCTAAAGAGCAGTGGACCAAATGAAGAGGAAAAATTTCT<br/>TACCTTGAACCGTATCTGAAAGAGGTTATTGCGGAAAGAAAAGAAAAGAGAAGAATGGGCAAAGAAG<br/>GGCGGAGGTGGGAGCGGTGGAGGGGGAAAGTGTGACCAAGGGCGAGGAGCTGTTACCGGGGGTG<br/>GTGCCCATCTGGTCGAGCTGGACGGCGACGTAACGGCCACAAGTTCAGCGTGTCCGGCGGAGG<br/>GCGAGGGCGATGCCACCTACGGCAAGCTGACCCTGAAGCTGATCTGCACCACCGCCAAAGCTGCC<br/>GTGCCCTGGCCACCCTCGTGACCACCCTGGGCTACGGCCTGCAGTGTTCGCCCGCTACCCCGA<br/>CCACATGAAGCAGCAGACTTCTTCAAGTCCGCCATGCCCGAAGGCTACGTCCAGGAGCGCACCAT<br/>CTTCTTCAAGGACGACGGCAACTACAAGACCCGCGCCGAGGTGAAGTTCGAGGGGCGACACCCTGG<br/>TGAACCGCATCGAGCTGAAGGGCATCGACTTCAAGGAGGACGGCAACATCTGGGGCACAAGCTG<br/>GAGTACAATAACAAGCCACAACGCTATATCACCGCCGACAAGCAGAAGAACGGCATCAAGGCC<br/>AACTTCAAGATCCGCCACAACATCGAGGACGGCGGGCTGCAGCTCGCCGACCACTACCAGCAGAA<br/>CACCCCATCGGCGACGGCCCCGTGCTGCTGCCCGACAACCACTACCTGAGCTACCAGTCCAAGC<br/>TGAGCAAAGACTAA</p>                                                                                                                                                                                                                                                                                                                                                                                                                                                                                                                                                                                                                                                                                                                                                                                                                                                                                                                                                                                                                                                                                                                                                                                                                   |
| <p><i>UQCRC1-C-VN210</i></p>  | <p>ATGGCGGCGTCCGTGGTCTGTGCGGGCCGCTACCGCCGGGGCACAAGTGTATTGCGCGCCCGCC<br/>GCTCGCCGGCCCTGCTGCGGACGCCAGCCTTGGGAGTACGGCAGTGAGCAAGGGCGAGGAGCT<br/>GTTACCGGGGGTGGTCCCATCCTGGTTCGAGCTGGACGGCGACGTAACGGCCACAAGTTCAGCG<br/>TGTCGGCGAGGGCGAGGGCGATGCCACCTACGGCAAGCTGACCCTGAAGCTGATCTGCACCACC<br/>GGCAAGCTGCCCGTCCCTGGCCACCCCTGACCCCTGGGCTACCGCTGCAGTGTCTTCCG<br/>CCGCTACCCCGACCACATGAAGCAGCAGACTTCTTCAAGTCCGCCATGCCCGAAGGCTACGTCCA<br/>GGAGCGCACCATCTTCTTCAAGGACGACGGCAACTACAAGACCCGCGCCGAGGTGAAGTTCGAGG<br/>GGGACACCCTGGTGAACCGCATCGAGCTGAAGGGCATCGACTTCAAGGAGGACGGCAACATCCTG<br/>GGCACAAGCTGGAGTACAACATAACAGCCACAACGCTTATATCACCGCCGACAAGCAGAAGAAC<br/>GGCATCAAGGCCAACTTCAAGATCCGCCACAACATCGAGGACGGCGGGCTGCAGCTCGCCGACCA<br/>CTACCAGCAGAACACCCCATCGGCGACGGCCCCGTGCTGCTGCCCGACAACCACTACCTGAGCT<br/>ACCAGTCCAAGCTGAGCAAAGACGGCGGAGGTGGGAGCGGTGGAGGGGGAAGTACGGCAACCTT<br/>CGCTCAGGGCTCCAGTTCTGTCGGGAGACGAGGTTAGCCTGCTGGACAACCGCCCTGCGTGTGG<br/>CCTCCGAGCAGTCTCTCAGCCACTTGCACGGTGGGAGTGTGGATTGATGTTGGCAGCCGTTTTG<br/>AGACTGAGAAGAATAATGGGGCAGGCTACTTTTTGGAGCATCTGGCTTTCAGGGAAACAAAGAATC<br/>GGCCTGGCAGTGGCCTGGAGAAGGAGGTGGAGGACATGGGGGGCCATCTTAATGCCTACAGCAC<br/>CGGGAGCACACAGCTTACTACATCAAGCGCTTCCAAGGATCTGCCGAAAGCTGTGGAGCTCT<br/>GGGTGACATTGTGCAGAACTGTAGTCTGGAAGACTCACAGATTGAGAAGGAACGTGATGTGATCCT<br/>GCGGGAGATGCAGGAGAATGATGCATCTATGCGAGATGTGGTCTTTAACTACCTGCATGCCACAGC<br/>ATTCCAGGGCACACCTCTAGCCAGGCTGTGGAGGGGGCCAGTGAGAATGTCAGGAAGCTGTCTC<br/>GTGCAGACTTGACCGAGTACCTCAGCACACATTACAAGGCCCCCTCGAATGGTGTGCCAGCAGCTG<br/>GAGGATGGAGCACCCAGCAACTGTTAGACCTCGCCCAAGAGCACCTCGGTGGCATCCCATGGACA<br/>TATGCAGAGGACGCTGTGCCACTTACTCCATGCCGCTTCACTGGCAGTGAGATCCGCCACCGT<br/>GATGATGCTTACCTTTTGGCCACGTGGCCATTGCAAGTAGAGGGTCTGGCTGGGCCAGCCCGGA<br/>CAATGTGGCCTTGAAGTGGCCAATGCCATCATCGGCCACTATGACTGCATATGGTGGTGGCGT<br/>GCACCTGTCCAGCCCACTGGCTTCCAGGTGCTGTGGCCAACAAGCTATGCCAGAGTTCCAGACCTT<br/>CAGCATCTGCTATGCAGAGACGGGCTTGTGGGTGCACACTTTGTCTGTGACCGAATGAAAATCGA<br/>TGACATGATGTTCTGCTGCAAGGGCAGTGGATGCGCCTGTGTACCAGTGCCACGGAGAGTGAGG<br/>TGGCCCGGGGCAAAAACATCCTCAGAAATGCCCTGGTATCTCATCTAGATGGCACTACTCCTGTGT<br/>GTGAGGACATCGGACGACGCTCTGACCTATGGCCGCGCATCCCCCTGGCTGAATGGGAAAGC<br/>CGGATTGCGGAGGTGGATGCCAGTGTGGTACGTGAGATCTGCTCCAAGTACATCTATGACCAAGTC<br/>CCAGCAGTGGCTGGATATGGCCCCATTGAGCAGCTCCAGACTACAACCGGATCCGTAGCGGCAT<br/>GTTCTGGCTGCGCTTCTAG</p> |
| <p><i>COX5B-N-VC210</i></p>   | <p>ATGGCTTCAAGGTTACTTCGCGGAGCTGGAACGCTGGCCGCGCAGGCCCTGAGGGCTCGCGGCC<br/>CCAGTGGCGCGGCCGCGATGCGCTCCATGGCAGACCCCAACGAGAAGCGCGATCACATGGTCTCT<br/>GCTGGAGTTCGTGACCGCCGCGGGCGGAGGTGGGAGCGGTGGAGGGGGAAGTATGGCATCTGGA<br/>GGTGGTGTCCCACTGATGAAGAGCAGGCGACTGGGTTGGAGAGGGAGATCATGCTGGCTGCAAA<br/>GAAGGGACTGGACCCATACAATGTACTGGCCCCAAAGGGAGCTTCAGGCCACCAGGGAAGACCCTA<br/>ATTTAGTCCCCTCCATCTCCAACAAGAGAATAGTAGGCTGCATCTGTGAAGAGGACAATACCAGCGT<br/>CGTCTGGTTTTGGTGCACAAAGGCGAGGCCAGCGATGCCCCCGCTGTGGAGCCCATACAAGC<br/>TGGTGCCCGCAGCAGCTGGCACACTAG</p>                                                                                                                                                                                                                                                                                                                                                                                                                                                                                                                                                                                                                                                                                                                                                                                                                                                                                                                                                                                                                                                                                                                                                                                                                                                                                                                                                                                                                                                                                                                                                                                                                                                                                                                                                                                          |
| <p><i>COX5B-C-VC210</i></p>   | <p>ATGGCTTCAAGGTTACTTCGCGGAGCTGGAACGCTGGCCGCGCAGGCCCTGAGGGCTCGCGGCC<br/>CCAGTGGCGCGGCCGCGATGCGCTCCATGGCAGTGGAGGTGGTGTTCCTCACTGATGAAGAGCAG<br/>GCGACTGGGTTGGAGAGGGGAGATCATGGCTGCAAAAGAAGGGACTGGACCCATACAATGTACT<br/>GGCCCCAAAGGGAGCTTCAGGCACCAGGGAAGACCCTAATTTAGTCCCCTCCATCTCCAACAAGAG<br/>AATAGTAGGCTGCATCTGTGAAGAGGACAATACCAGCGTCTGCTGGTTTTGGCTGCACAAAGGCCGA<br/>GGCCAGCGATGCCCCCGCTGTGGAGCCATTACAAGCTGGTGGCCAGCAGCTGGCACACGGC<br/>GGAGGTGGGAGCGGTGGAGGGGGAAGTGAACCCCAACGAGAAGCGCGATGATGTTCTGCTGG<br/>AGTTCGTGACCGCCGCGGGATCACTCTCGGCATGGACGAGCTGTACAAGTAG</p>                                                                                                                                                                                                                                                                                                                                                                                                                                                                                                                                                                                                                                                                                                                                                                                                                                                                                                                                                                                                                                                                                                                                                                                                                                                                                                                                                                                                                                                                                                                                                                                                                                                                                                                                                                    |
| <p><i>COX7A2L-N-VC210</i></p> | <p>ATGGCTTCAAGGTTACTTCGCGGAGCTGGAACGCTGGCCGCGCAGGCCCTGAGGGCTCGCGGCC<br/>CCAGTGGCGCGGCCGCGATGCGCTCCATGGCAGACCCCAACGAGAAGCGCGATCACATGGTCTCT<br/>CTGGAGTTCGTGACCGCCGCGGGCGGAGGTGGGAGCGGTGGAGGGGGAAGTATGGCATCTGGA<br/>GGTGGTGTCCCACTGATGAAGAGCAGGCGACTGGGTTGGAGAGGGAGATCATGCTGGCTGCAAA<br/>GAAGGGACTGGACCCATACAATGTACTGGCCCCAAAGGGAGCTTCAGGCCACCAGGGAAGACCCTA<br/>ATTTAGTCCCCTCCATCTCCAACAAGAGAATAGTAGGCTGCATCTGTGAAGAGGACAATACCAGCGT<br/>CGTCTGGTTTTGGTGCACAAAGGCGAGGCCAGCGATGCCCCCGCTGTGGAGCCCATACAAGC<br/>TGGTGCCCGCAGCAGCTGGCACACTAG</p>                                                                                                                                                                                                                                                                                                                                                                                                                                                                                                                                                                                                                                                                                                                                                                                                                                                                                                                                                                                                                                                                                                                                                                                                                                                                                                                                                                                                                                                                                                                                                                                                                                                                                                                                                                                           |

|                      |                                                                                                                                                                                                                                                                                                                                                                                                                                                                                                                                                                                                                                                                                                                                                                                                                                                                            |
|----------------------|----------------------------------------------------------------------------------------------------------------------------------------------------------------------------------------------------------------------------------------------------------------------------------------------------------------------------------------------------------------------------------------------------------------------------------------------------------------------------------------------------------------------------------------------------------------------------------------------------------------------------------------------------------------------------------------------------------------------------------------------------------------------------------------------------------------------------------------------------------------------------|
|                      | AGTTCCAGAGCTACAAAAGTTTTCCAGAAAGCTGATGGTGTGCCCGTCTACCTGAAACGAGGCCTGCCTGACCAAATGCTTTACCGGACCACCATGGCGCTGACTGTGGGAGGGACCATCTACTGCCTGATCGCCCTCTACATGGCTTCGCAGCCCAAAAACAATAA                                                                                                                                                                                                                                                                                                                                                                                                                                                                                                                                                                                                                                                                                                    |
| <i>UQCRB-C-LgBit</i> | ATGGCTGGTAAGCAGGCCGTTTCAGCATCAGGCAAGTGGCTGGATGGTATTGAAAAATGGTATTAC AATGCTGCAGGATTCAATAAACTGGGGTTAATGCGAGATGATACAATATACGAGGATGAAGATGTAA AAGAAGCCATAAGAAGACTTCTGAGAACCTTTATAATGACAGGATGTTTCGCATTAAGAGGGCACT GGACCTGAACTTGAAGCATCAGATCTTGCCTAAAGAGCAGTGGACCAAATGAAGAGGAAAAATTC TACCTTGAACCGTATCTGAAAGAGGTTATTTCGGGAAAGAAAAGAAAAGAGAAGAATGGGCAAAGAAG GGCGGAGGTGGGAGCGGTGGAGGGGGAAGTGTCTTACACTCGAAGATTTCTTGGGGACTGGG AACAGACAGCCGCTACAACCTGGACCAAGTCTTGAACAGGGAGGTGTGTCCAGTTTGTGCAGA ATCTCGCCGTGTCCGTAACCTCCGATCCAAAGGATTGTCCGGAGCGGTGAAAATGCCCTGAAGATCG ACATCCATGTCATCATCCCGTATGAAGGTCTGAGCGCCGACCAAATGGCCAGATCGAAGAGGTGT TTAAGTGGTGTACCCTGTGGATGATCATCACTTTAAGGTGATCCTGCCCTATGGCACACTGGTAAT CGACGGGTTACGCCGAACATGCTGAACTATTTCCGACGGCCGATGAAGGCATCGCCGTGTTCCG ACGGCAAAAAGATCACTGTAACAGGGACCCTGTGGAACGGCAACAAAATTATCGACGAGCGCCTGA TCACCCCGACGGTCCATGCTGTTCCGAGTAACCATCAACAGCTAA |
| <i>COX5B-N-SmBit</i> | ATGGCTCAAGGTTACTTCGCGGAGCTGGAACGCTGGCCGCGCAGGCCCTGAGGGCTCGCGGCC CCAGTGGCGCGGCCGCGATGCGCTCCATGGCAGTGACCGCTACCGGCTGTTCCAGGAGATTCTC GCGGAGGTGGGAGCGGTGGAGGGGGAAGTATGCGCATCTGGAGGTGGTGTCCCACTGATGAAG AGCAGGCGACTGGGTTGGAGAGGGAGATCATGCTGGTGCAAAGAAGGGACTGGACCCATACAAT GTACTGGCCCCAAAGGGAGCTTCAGGCACCAGGGAAGACCCTAATTTAGTCCCCTCCATCTCCAAC AAGAGAATAGTAGGCTGCATCTGTGAAGAGGACAATACCAGCGTCGTCTGGTTTTGGCTGCACAAA GCGGAGGCCAGCGATGCCCCCGCTGTGGAGCCCATTACAAGCTGGTGGCCAGCAGCTGGCAC ACTAG                                                                                                                                                                                                                                                                                                                                                                                               |
| <i>COX5B-C-SmBit</i> | ATGGCTCAAGGTTACTTCGCGGAGCTGGAACGCTGGCCGCGCAGGCCCTGAGGGCTCGCGGCC CCAGTGGCGCGGCCGCGATGCGCTCCATGGCAGTGGAGGTGGTGTCCCACTGATGAAGAGCAG GCGAGTGGTTGGAGAGGGGAGATCATGCTGGTGCAAAGAAGGGACTGGACCCATACAATGTACT GGCCCCAAAGGGAGCTTCAGGCACCAGGGAAGACCCTAATTTAGTCCCCTCCATCTCCAACAAGAG AATAGTAGGCTGCATCTGTGAAGAGGACAATACCAGCGTCGTCTGGTTTTGGCTGCACAAAGGCGA GGCCAGCGATGCCCCCGCTGTGGAGCCCATTACAAGCTGGTGGCCAGCAGCTGGCACACGGC GGAGGTGGGAGCGGTGGAGGGGGAAGTGTGACCGCTACCGGCTGTTTCGAGGAGATTCTCTAA                                                                                                                                                                                                                                                                                                                                                                                                      |

| <b>CRISPR sgRNAs</b> |                           |
|----------------------|---------------------------|
| <i>NTC_F</i>         | caccgCTGAAGGTGTCTGGCAGAGC |
| <i>NTC_R</i>         | aaacGCTCTGCCAGACACCTTCAGc |
| <i>SCAF1_F</i>       | caccgGCAGAAGTTGGCAGGAGCAT |
| <i>SCAF1_R</i>       | aaacATGCTCCTGCCAACTTCTGCc |
| <i>HIGD2A_F</i>      | caccgACTTACCTATGGGTACCACC |
| <i>HIGD2A_R</i>      | aaacGGTGGTACCCATAGGTAAGTc |
| <i>DHODH_F</i>       | caccgATCTCCCGTGGCCATCAGGT |
| <i>DHODH_R</i>       | aaacACCTGATGGCCACGGGAGATc |
| <i>FAR1_F</i>        | caccgAGCACTAATCCTTTCCACTG |
| <i>FAR1_R</i>        | aaacCAGTGGAAGGATTAGTGCTc  |
| <i>AGPS_g1_F</i>     | caccgCAATTTGACAGCTCATGTAG |
| <i>AGPS_g1_R</i>     | aaacCTACATGAGCTGTCAAATTGc |
| <i>AGPS_g2_F</i>     | caccgGTACCAATGAGTGCAAAGCG |
| <i>AGPS_g2_R</i>     | aaacCGCTTTGCACTCATTGGTACc |

|                              |  |
|------------------------------|--|
| <b>Expression constructs</b> |  |
|------------------------------|--|

*FAR1 (CRISPR  
resistant)*

atggttcaatcccagaatactatgaaggcaagaacgtcctcctcacaggagctaccggtttctaggaagggtcctctggaagggtgctgaggtc  
ttgtcctaaggtaattcagtatatggttgaggcagaagctggacagacaccaagagcgagtggaagaagtccttagtggcaagcttttg  
acagattgagagatgaaaatccagatttagagagaaaattatagcaatcaacagcgaactcaccacctaactggctctcagtgaagaaga  
taaagaggatcatagatttccaatattatattccactgtgcagctacagtaaggttaatgaaaattaaagagatgctgttcagttaaatgtgattg  
caacgcgacagcttattcctctgcacaacaaatgaagaatctggaagtggtcatgcatgatcaacagcatatgcctactgtaatcgcaagcatatt  
gatgaagtagtctatccaccacctgtggatccaagaagctgattgattcttagagtgatggatgatggcctagtaaagatcagccaaaatt  
gataggagacagacctaatacatacatatacacaagaacattggcagaataatgtgtacaacaagaaggagcaaaaactaatgtggcaattgta  
aggccatcgattgttggtccagttggaagaacctttccaggatggattgataactttaatggaccaagtggtctcttattcgggcagggaaggga  
attcttgaacaatacgtgcctccaacaatgccctgcagatctgttctgtagatgtagtgtcaacatgagctctgcggcagcctggtatccggagtt  
aatagaccaagaacatcatggtgtataattgtacaacaggcTCCacAaaCccCtTcaTtgggggaagttgagtagcctgtaattccacttt  
caagaggaatcctctcgaacaggcctcagacggcccaatgtaaatctaacctccaatcatctttatacattactggattgctgtaagccataaggc  
cccagcattcctgtatgatatctacctcaggatgactggaagaagcccaaggatgataaaacaataactcgtctcacaagcctatggtgtttctg  
aatattcacaagtaattctgggttgaatactgagaatgtcaaatgttaaatcaactaaacctgaagataaaaagacctcaatattgatgt  
acggcagttacattgggcagaatataagagaactactgcttgggaactaagaagtagctattgaaatgagaatgtctggcctccctgagccag  
aaaaatctgaacaagttgcggaatatacgttatggtttaatactatcctgtgatcctcatctggcatttttattgcaagatcacaatggcaagaa  
atatctggtactttggttagtctgtgtacaagttttgcatactccgagcatccagcactatgagatactga

**Supplementary Table 2.** Small molecule screening data

| Category          | Parameter                                | Description                                                                                                                                                                                                                                                                                                                                                                                                                                                                                                                                                                                                                                                                                                                                                                                                                                                                                                      |
|-------------------|------------------------------------------|------------------------------------------------------------------------------------------------------------------------------------------------------------------------------------------------------------------------------------------------------------------------------------------------------------------------------------------------------------------------------------------------------------------------------------------------------------------------------------------------------------------------------------------------------------------------------------------------------------------------------------------------------------------------------------------------------------------------------------------------------------------------------------------------------------------------------------------------------------------------------------------------------------------|
| Assay             | Type of assay                            | Luminescent/fluorescent plate reader assay                                                                                                                                                                                                                                                                                                                                                                                                                                                                                                                                                                                                                                                                                                                                                                                                                                                                       |
|                   | Target                                   | NanoBit luminescence per cell                                                                                                                                                                                                                                                                                                                                                                                                                                                                                                                                                                                                                                                                                                                                                                                                                                                                                    |
|                   | Primary measurement                      | Luminescence                                                                                                                                                                                                                                                                                                                                                                                                                                                                                                                                                                                                                                                                                                                                                                                                                                                                                                     |
|                   | Key reagents                             | NanoGlo Live Cell Assay System (Promega, N2012)                                                                                                                                                                                                                                                                                                                                                                                                                                                                                                                                                                                                                                                                                                                                                                                                                                                                  |
|                   | Assay protocol                           | Cells resuspended in DMEM high glucose (HyClone) supplemented with 10% FBS, 1% P/S, and 1 mM pyruvate were seeded into 384-well plates (Corning, 3765) at a density of 1,000 cells/well in 30 $\mu$ l. Compounds dissolved in DMSO were pin replicated (33 nl) into 384-well plates containing seeded cells and incubated at 37°C with 5% CO <sub>2</sub> for two days. On the day of analysis, 10 $\mu$ l of Hoescht solution dissolved in PBS was added to each well (5 $\mu$ g/ml final) and incubated at room temperature for 30 minutes. Hoescht imaging and cell counting was performed using the TTPLabTech Acumen eX3/HCl. Next, 20 $\mu$ l of NanoGlo solution was added to each well and incubated on a shaker for 10 minutes. A white plate seal (Sigma Aldrich, Z732117) was attached to the bottom of each plate and luminescence was measured twice/well using Perkin Elmer EnVision plate reader. |
|                   | Additional comments                      |                                                                                                                                                                                                                                                                                                                                                                                                                                                                                                                                                                                                                                                                                                                                                                                                                                                                                                                  |
| Library           | Library size                             | 4,703 compound wells                                                                                                                                                                                                                                                                                                                                                                                                                                                                                                                                                                                                                                                                                                                                                                                                                                                                                             |
|                   | Library composition                      | Known bioactive compounds                                                                                                                                                                                                                                                                                                                                                                                                                                                                                                                                                                                                                                                                                                                                                                                                                                                                                        |
|                   | Source                                   | Various                                                                                                                                                                                                                                                                                                                                                                                                                                                                                                                                                                                                                                                                                                                                                                                                                                                                                                          |
|                   | Additional comments                      | <a href="https://iccb.med.harvard.edu/compound-libraries">https://iccb.med.harvard.edu/compound-libraries</a>                                                                                                                                                                                                                                                                                                                                                                                                                                                                                                                                                                                                                                                                                                                                                                                                    |
| Screen            | Format                                   | 384-well                                                                                                                                                                                                                                                                                                                                                                                                                                                                                                                                                                                                                                                                                                                                                                                                                                                                                                         |
|                   | Concentration(s) tested                  | ~10, 2, 0.4, 0.08 $\mu$ M                                                                                                                                                                                                                                                                                                                                                                                                                                                                                                                                                                                                                                                                                                                                                                                                                                                                                        |
|                   | Plate controls                           | Tunicamycin (15 nM), DMEM [0 mM glucose + 10 mM galactose + 1 mM glucosamine]                                                                                                                                                                                                                                                                                                                                                                                                                                                                                                                                                                                                                                                                                                                                                                                                                                    |
|                   | Reagent/ compound dispensing system      | Custom pin transfer workstation at ICCB-Longwood Screening Facility, Harvard Medical School                                                                                                                                                                                                                                                                                                                                                                                                                                                                                                                                                                                                                                                                                                                                                                                                                      |
|                   | Detection instrument and software        | TTPLabTech Acumen eX3/HCl, Perkin Elmer EnVision plate reader                                                                                                                                                                                                                                                                                                                                                                                                                                                                                                                                                                                                                                                                                                                                                                                                                                                    |
|                   | Assay validation/QC                      | Z' factors for each assay plate                                                                                                                                                                                                                                                                                                                                                                                                                                                                                                                                                                                                                                                                                                                                                                                                                                                                                  |
|                   | Correction factors                       |                                                                                                                                                                                                                                                                                                                                                                                                                                                                                                                                                                                                                                                                                                                                                                                                                                                                                                                  |
|                   | Normalization                            | NanoBit luminescence was corrected by cell number (Hoescht)                                                                                                                                                                                                                                                                                                                                                                                                                                                                                                                                                                                                                                                                                                                                                                                                                                                      |
|                   | Additional comments                      | N/A                                                                                                                                                                                                                                                                                                                                                                                                                                                                                                                                                                                                                                                                                                                                                                                                                                                                                                              |
| Post-HTS analysis | Hit criteria                             | z-score>1.98                                                                                                                                                                                                                                                                                                                                                                                                                                                                                                                                                                                                                                                                                                                                                                                                                                                                                                     |
|                   | Hit rate                                 | ~2%                                                                                                                                                                                                                                                                                                                                                                                                                                                                                                                                                                                                                                                                                                                                                                                                                                                                                                              |
|                   | Additional assay(s)                      |                                                                                                                                                                                                                                                                                                                                                                                                                                                                                                                                                                                                                                                                                                                                                                                                                                                                                                                  |
|                   | Confirmation of hit purity and structure | N/A                                                                                                                                                                                                                                                                                                                                                                                                                                                                                                                                                                                                                                                                                                                                                                                                                                                                                                              |
|                   | Additional comments                      | N/A                                                                                                                                                                                                                                                                                                                                                                                                                                                                                                                                                                                                                                                                                                                                                                                                                                                                                                              |

Supplementary Figure 1. Gating strategy for flow cytometry (related to Fig. 4j).

DMSO

Brequinar (250 nM)

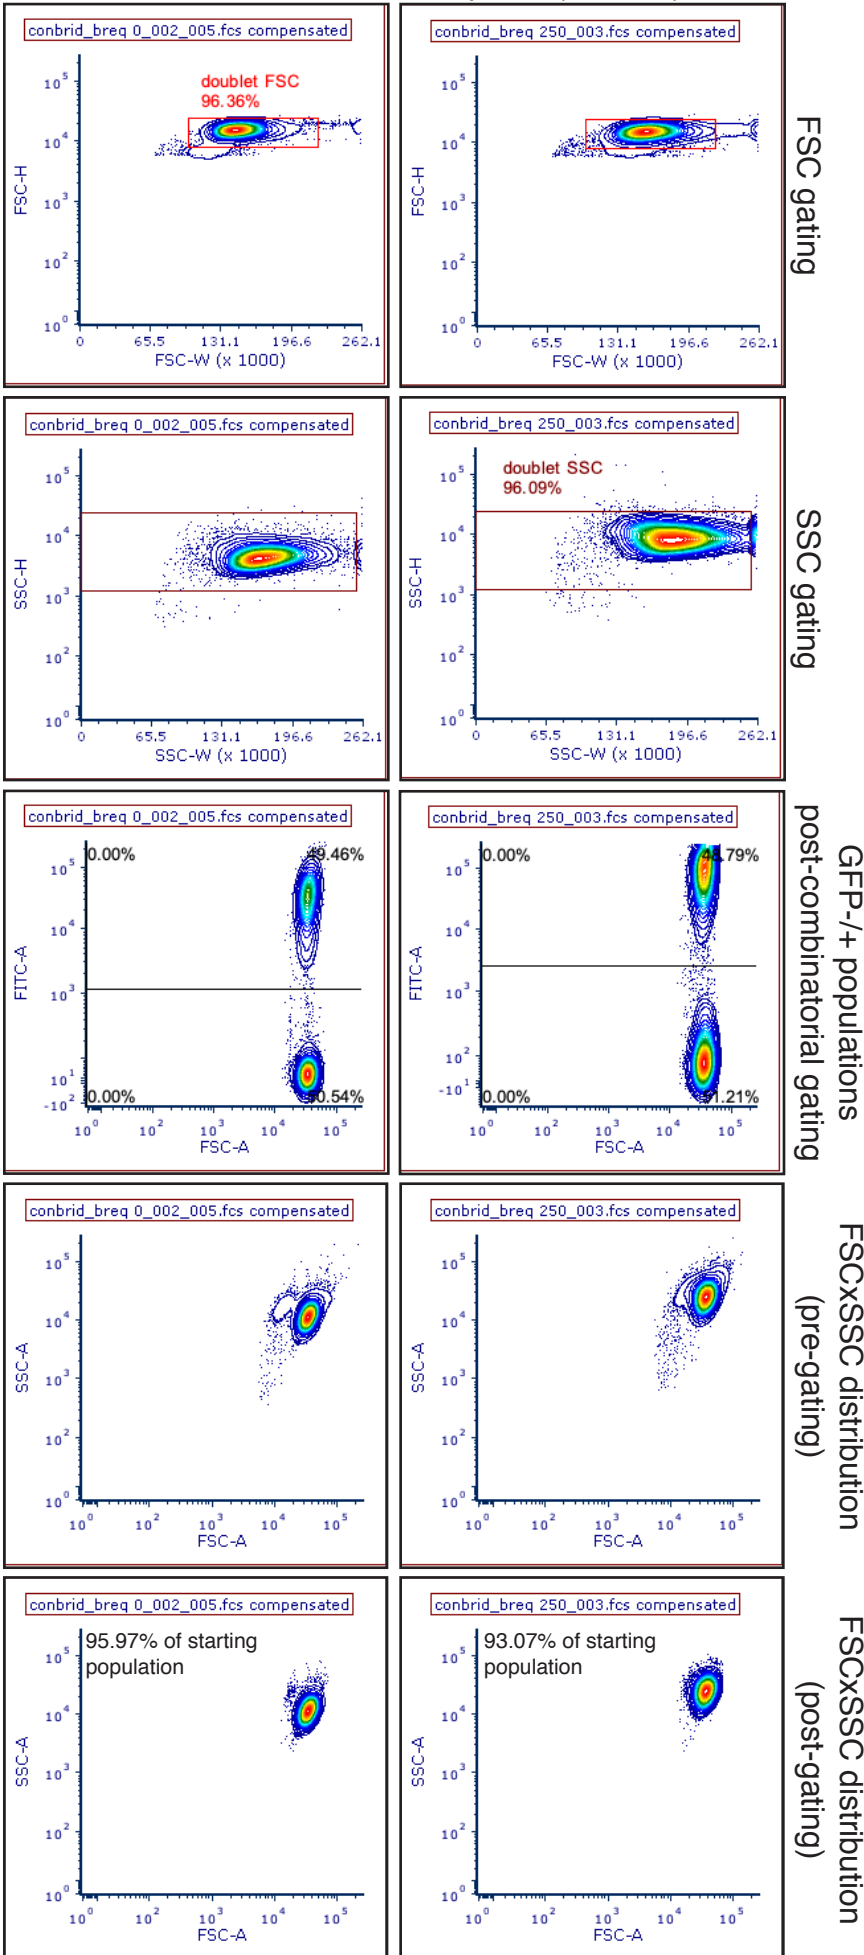

Supplement: NIHMS1673285-supplement-SuppInfo.pdf [file NIHMS1673285-supplement-SuppInfo.pdf]
